# Supplementary material for: Shape-memory Nanofiber Meshes with Programmable Cell Orientation
Source: Preprints.org preprint supplement (doi:10.20944/preprints201811.0585.v1), 2018-11-26
Supplement: Supplementary file 2 [file supplementary]

Supplementary Materials

**Shape-memory Nanofiber Meshes with Programmable Cell Orientation**

**Eri Niiyama1,2, Kanta Tanabe1,3, Koichiro Uto4, Akihiko Kikuchi3 and Mitsuhiro Ebara1,2,3***

1 International Center for Materials Nanoarchitectonics (WPI-MANA), National Institute for Materials Science (NIMS), Tsukuba, Ibaraki 305-0044, Japan

2 Graduate School of Pure and Applied Sciences, University of Tsukuba, Tsukuba, Ibaraki 305-8577, Japan

3 Department of Materials Science and Technology, Tokyo University of Science, 6-3-1 Niijuku, Katsushika, Tokyo 125-8585, Japan

4 International Center for Young Scientists (ICYS), National Institute for Materials Science (NIMS), Tsukuba, Ibaraki 305-0044, Japan

***** Correspondence: EBARA.Mitsuhiro@nims.go.jp


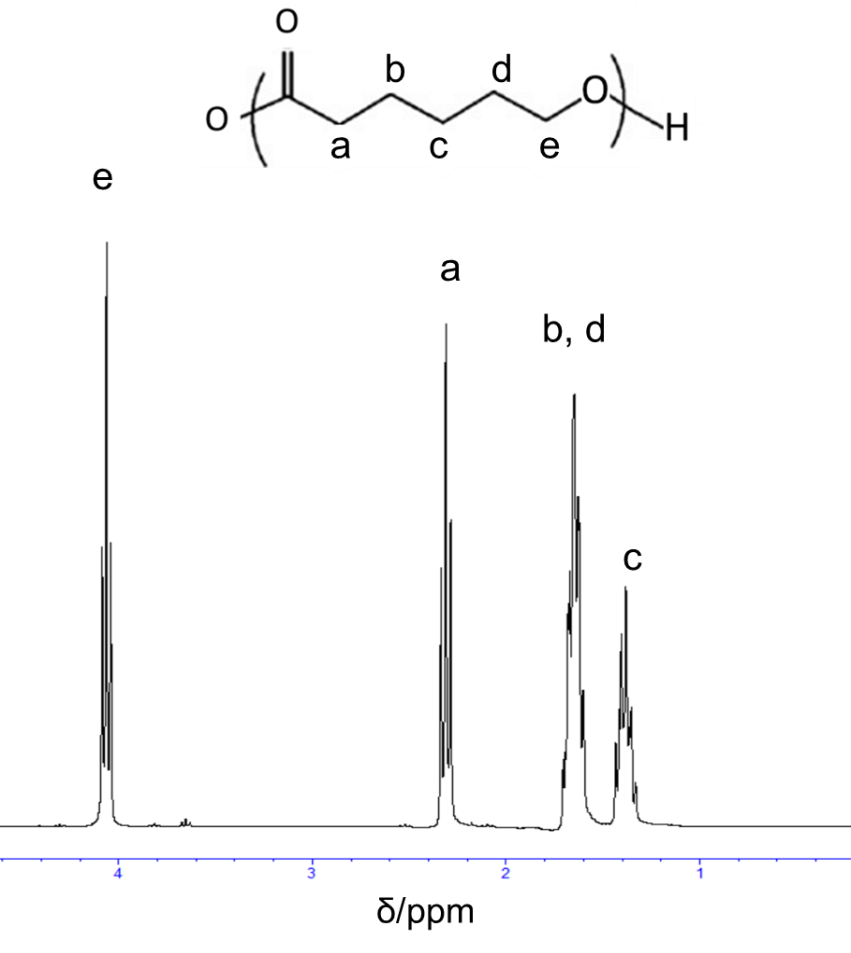


**Figure S1.** 1H-NMR spectrum of PCL.


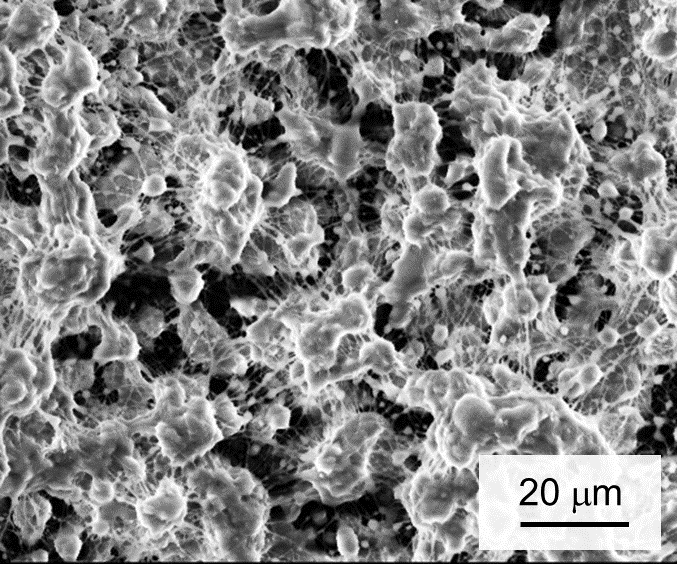


**Figure S2.** SEM image of electrospun PCL with molecular weight of 5,000.


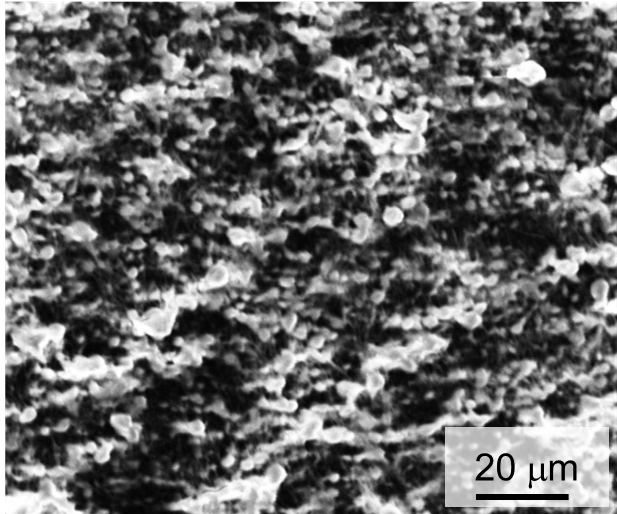


**Figure S3.** SEM image of electrospun fibers from PCL-21.3 (400× magnification).


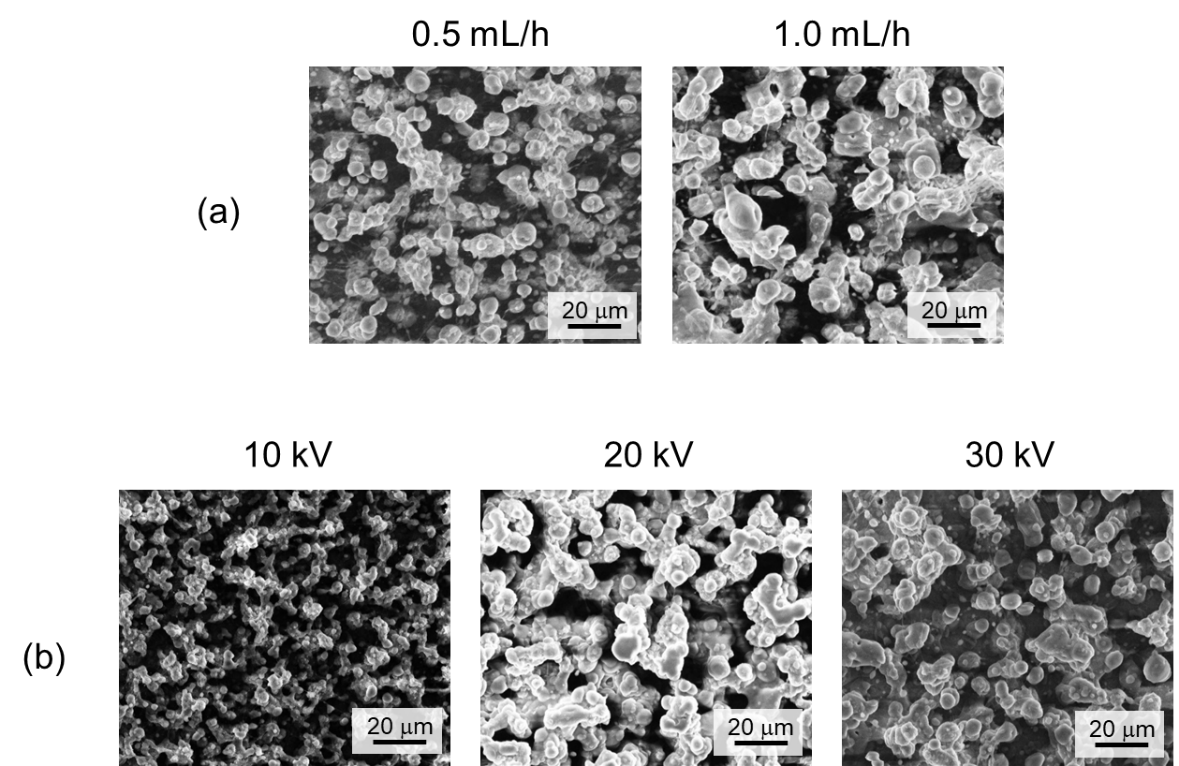


**Figure S4.** SEM images of electrospun fibers from four-branched PCL with different flow rates (0.5 mL and 1.0 mL) and voltages (10, 20, and 30 kV).


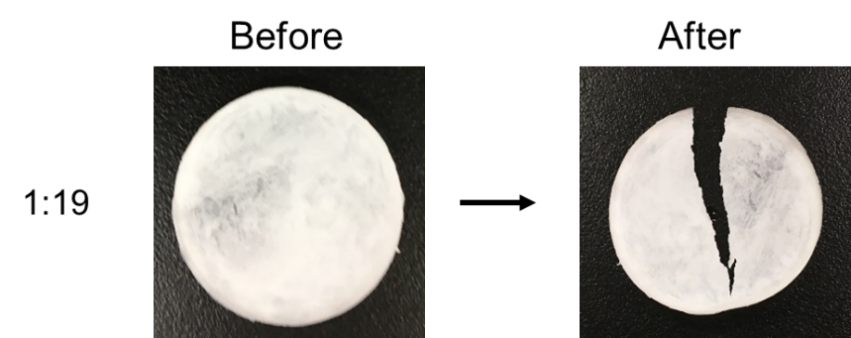


**Figure S5.** PCL-21.3 film before and after heating at 80°C.


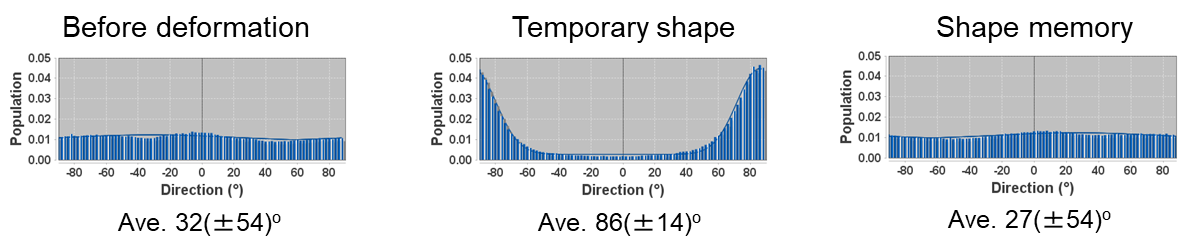


**Figure S6.** Orientation analysis of PCL-9.2 nanofibers from SEM images shown in Figure 4(a) before deformation, after deformation, and after shape memory recovery.


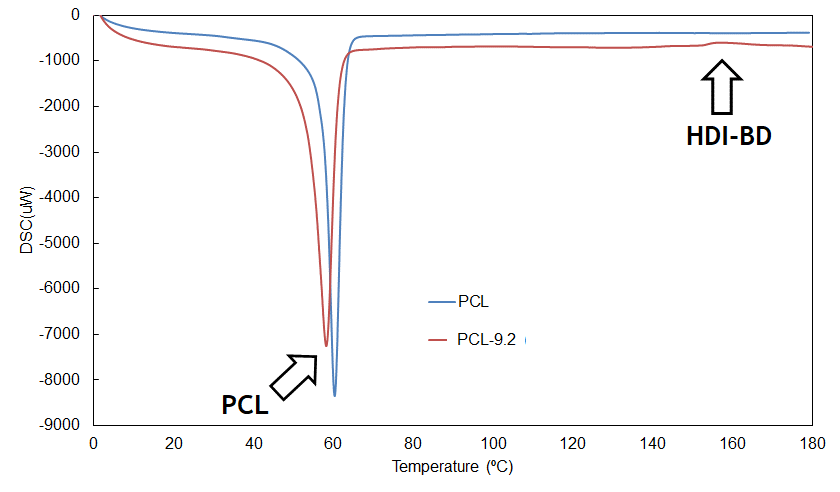


Figure S7. DSC curve of electrospun nanofiber of pure PCL and PCL-9.2.


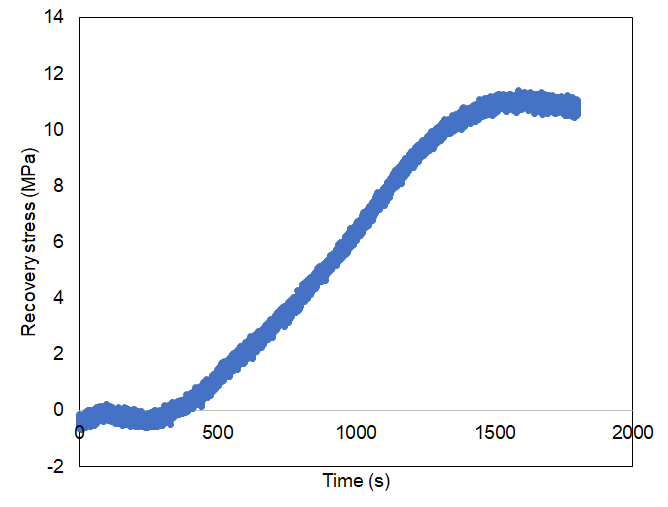


**Figure S8.** Recovery stress of electrospun PCL-9.2 nanofiber mesh.
